# Supplementary material for: Genome-wide transcription factor–binding maps reveal cell-specific changes in the regulatory architecture of human HSPCs
Source: PubMed Central journal article supplement — Blood. 2023 Aug 20;142(17):1448–62. doi: 10.1182/blood.2023021120 (PMC10651876; doi:10.1182/blood.2023021120), 2023-08-20
Supplement: BLOOD_BLD-2023-021120-mmc1.pdf [file BLOOD_BLD-2023-021120-mmc1.pdf]

## Subramanian et al Supplemental Tables and Figures, and Methods

### List of supplemental Tables:

Table S1. Donor information

Table S2. ChIP data mapping summary

Table S3. Significant HiChIP loops

Table S4. List of heptad *cis* Regulatory Elements (CREs)

Table S5. Gene lists used in Figure 4 and Figure 5

Table S6. Complete statistics for Supplemental Figure 9

Table S7. Model performance

Table S8. Motifs

Table S9. Key reagents used in this work

Table S10. Indexing primers

## **Supplemental Figure Titles and Legends**

**A**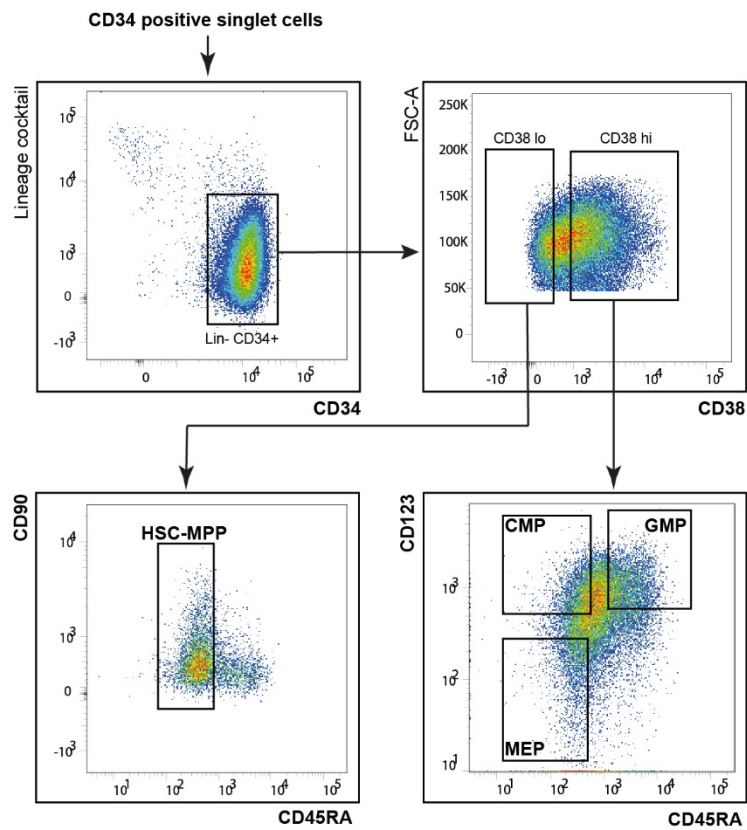**B**

■ BFU-E  
□ GM  
■ GEMM

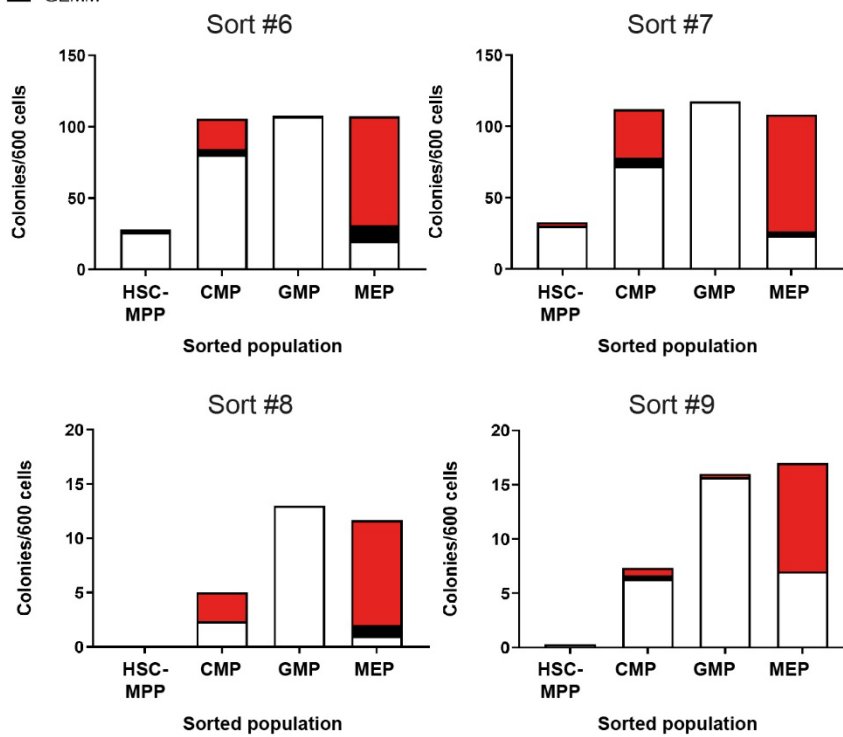

Figure S1

**Figure S1. Workflow for deriving HSPC fractions and verifying their identity.** **A)** Gating strategy and representative sort gates for isolation of HSC-MPP, CMP, GMP, and MEP. **B)** Representative CFU assays using sorted HSC-MPP, CMP, GMP, and MEP populations.

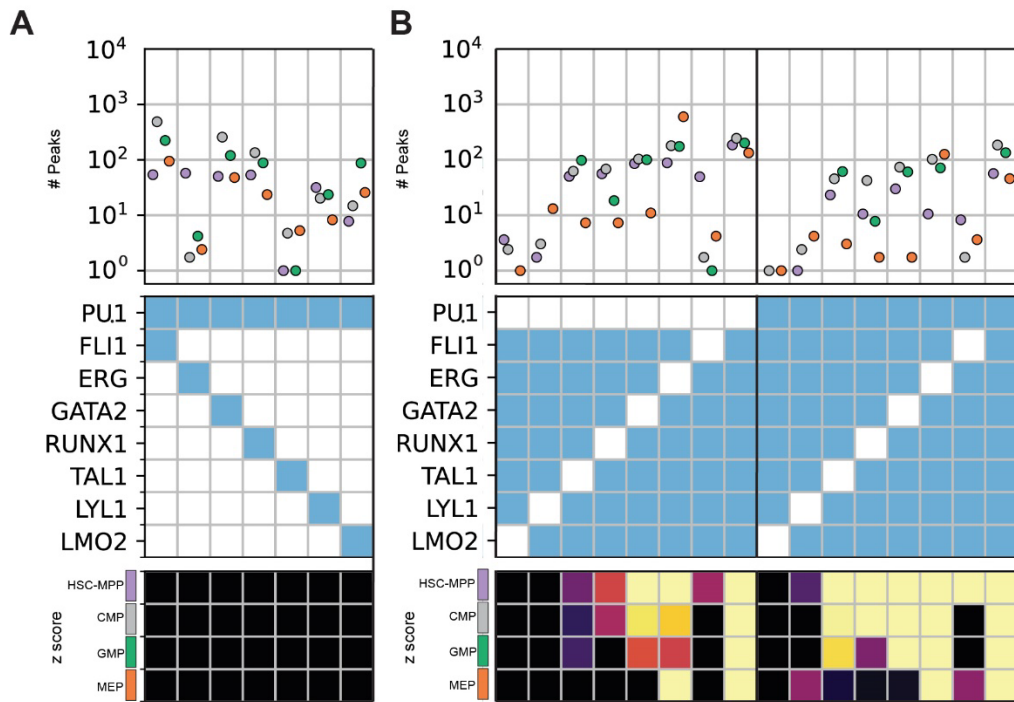

Figure S2

**Figure S2. Combinatorial binding of heptad transcription factors and PU.1.** (A-B) composite graphs with three components; (*upper*) number of combinatorial binding peaks identified in the four cell types, for (*middle*) combinations of heptad factors and PU.1 and (*lower*) heatmap showing z-scores for the combinations presented above. **A)** 2 TF combinations including PU.1. **B)** 6, 7, 8 TF combinations of heptad TFs without and with PU.1.

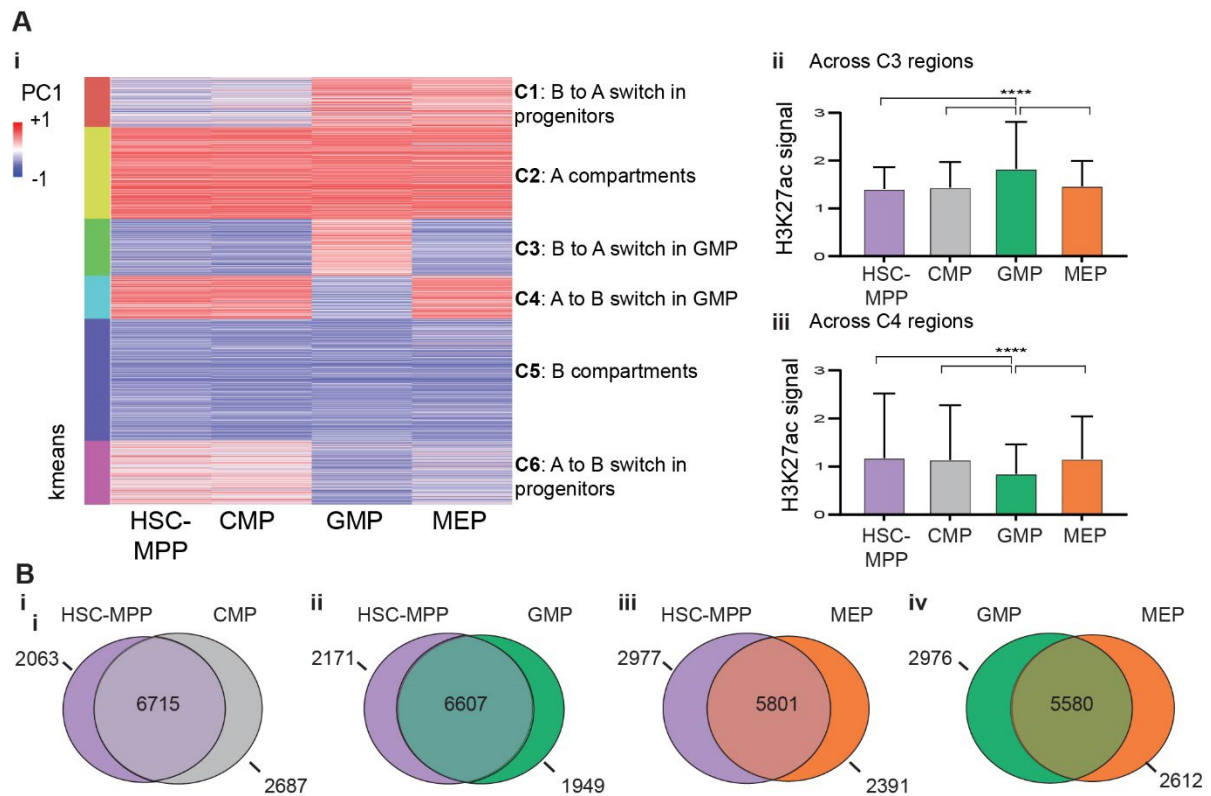

Figure S3

**Figure S3. Compartment switching and conserved TADs along blood stem cell differentiation.** **A**) i) A *k*-means clustered heatmap of the PC1 values showing compartmental switches taking place between the four HSPC populations. Average H3K27ac signal in ii) Cluster C3 regions, and in iii) Cluster C4 regions among the four cell types. Significance scores were calculated using pairwise *t* tests ( $p < 0.0001$ ). **B**) Pairwise comparisons of topological domain (TAD) boundaries between i) HSC-MPP and CMP, ii) HSC-MPP and GMP, iii) HSC-MPP and MEP, and iv) GMP and MEP (domains identified using HOMER).

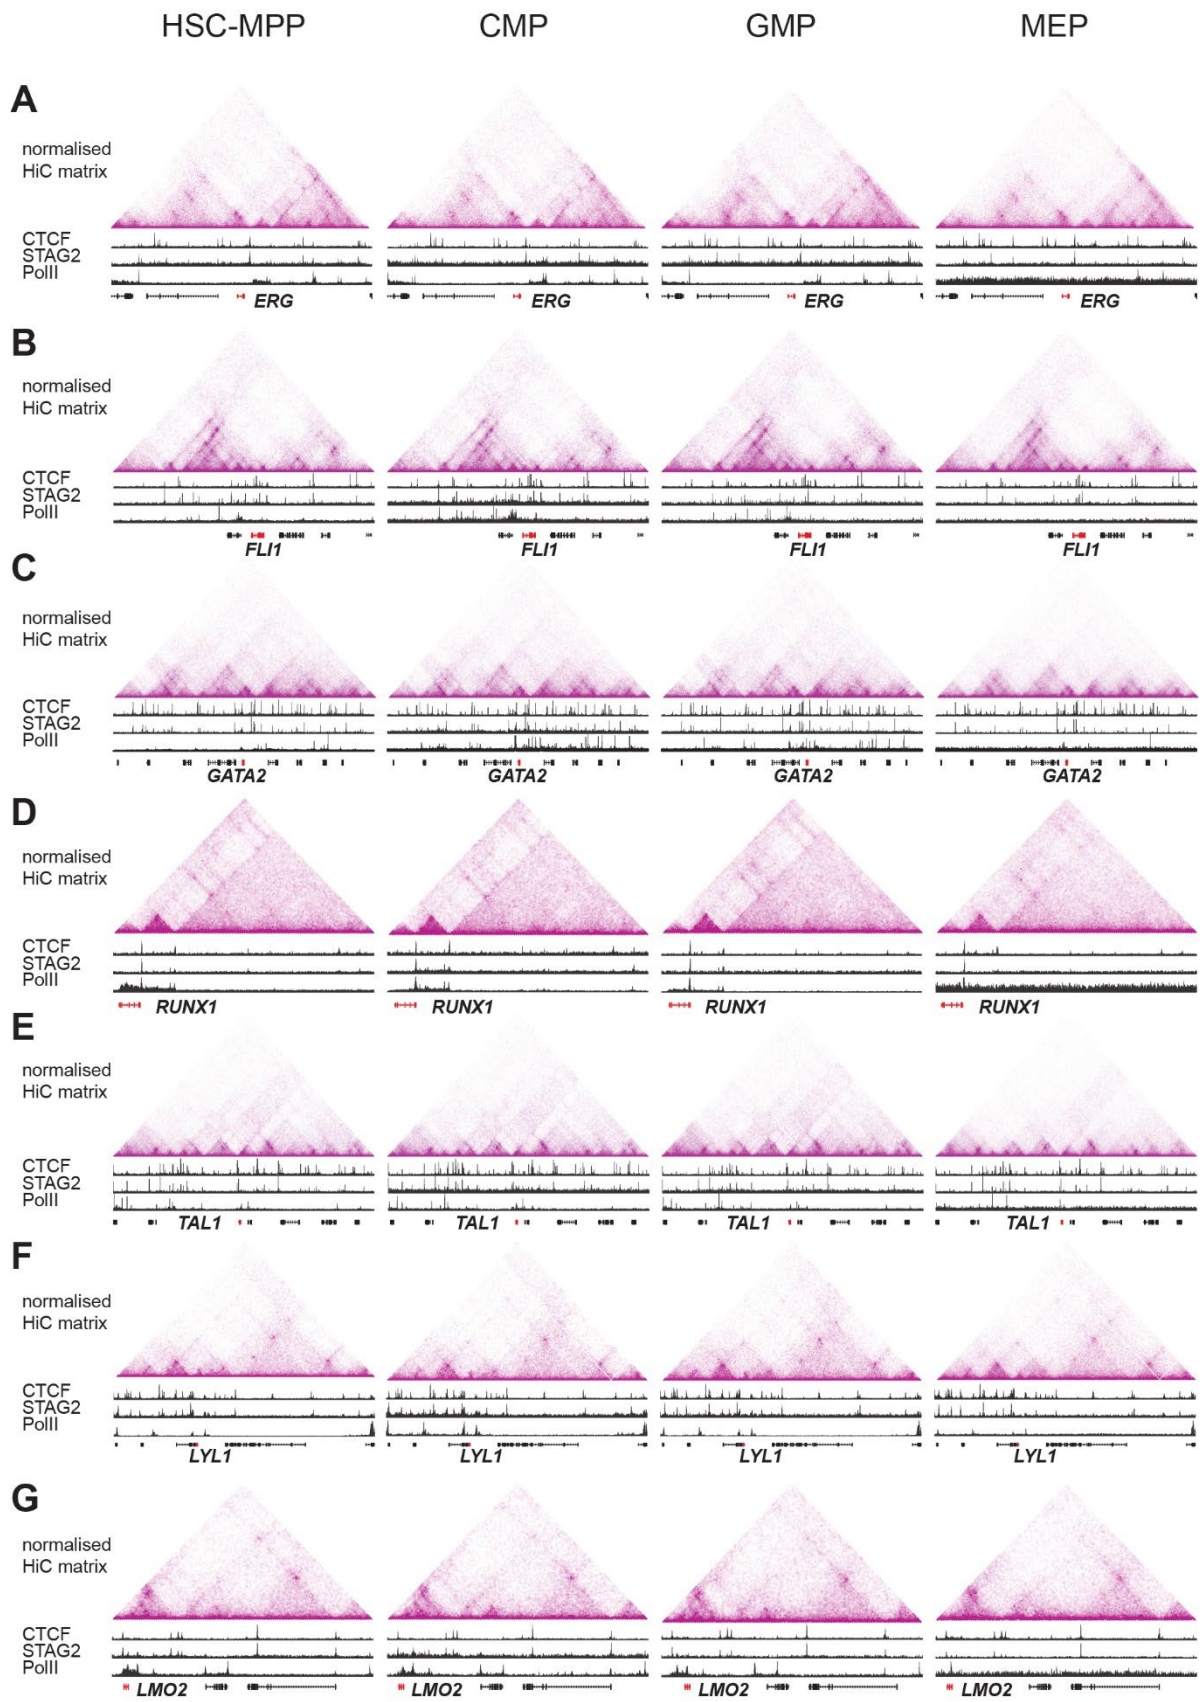

**Figure S4. The genome architecture at heptad gene regulatory loci is conserved across HSPC subsets.** Normalised HiC contact matrices at 10 kb resolution located at individual heptad genes' regulatory loci – **A)** *FLII* locus (GRCh38 chr11:128511084-128978507), **B)** *ERG* locus (GRCh38 chr21:37370238-39198738), **C)** *GATA2* locus (GRCh38 chr3:128262936-128761435), **D)** *RUNX1* locus (GRCh38 chr21:34758869-36011624), **E)** *TALI* locus (GRCh38 chr1:47168881-47340728), **F)** *LYLI* locus (GRCh38 chr19:12787014-13852204), and **G)** *LMO2* locus (GRCh38 chr11:33831641-34445745), in HSC-MPP, CMP, GMP, and MEP respectively. Accompanying each triangular plot are ChIP-seq tracks showing normalized CTCF, STAG2, and PolII signal.



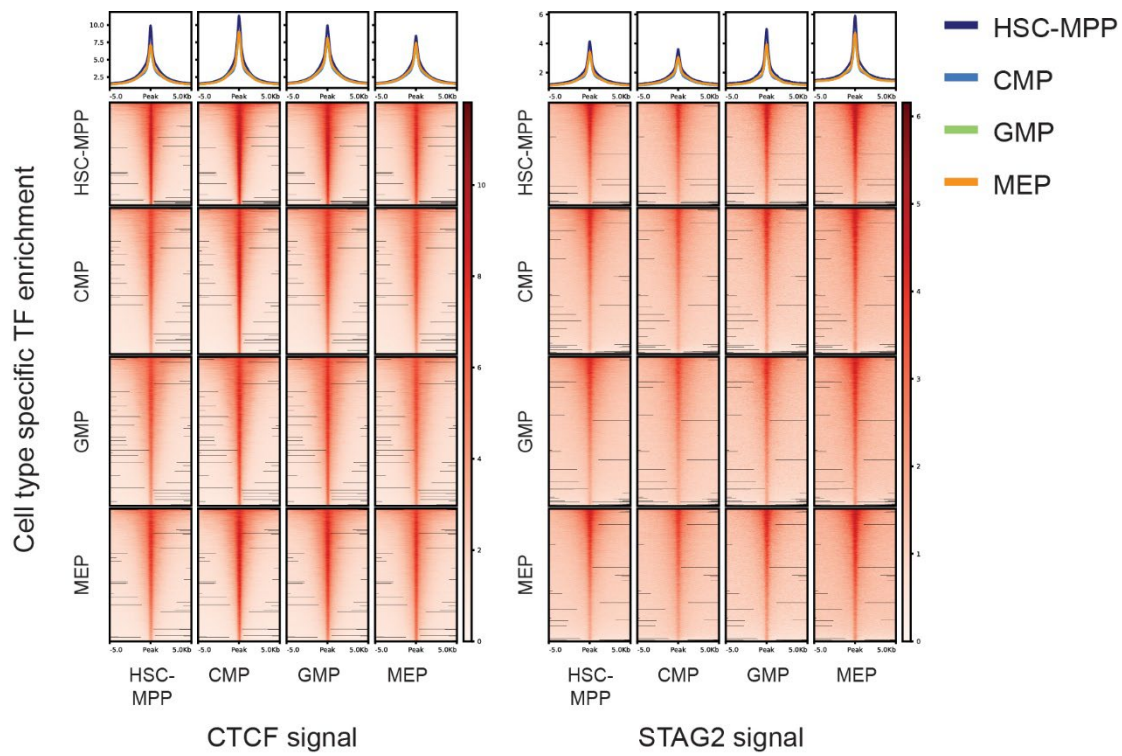

Figure S5

**Figure S5. CTCF and STAG2 occupancy across cell types.** Density plots showing CTCF (*left*) and STAG2 (*right*) signal in each cell type at CTCF peak regions (identified by macs2;  $p < 1e-5$ ) in HSC-MPP, CMP, GMP, MEP. CTCF and STAG2 occupancy at CTCF-bound sites shows minimal variation between cell types.

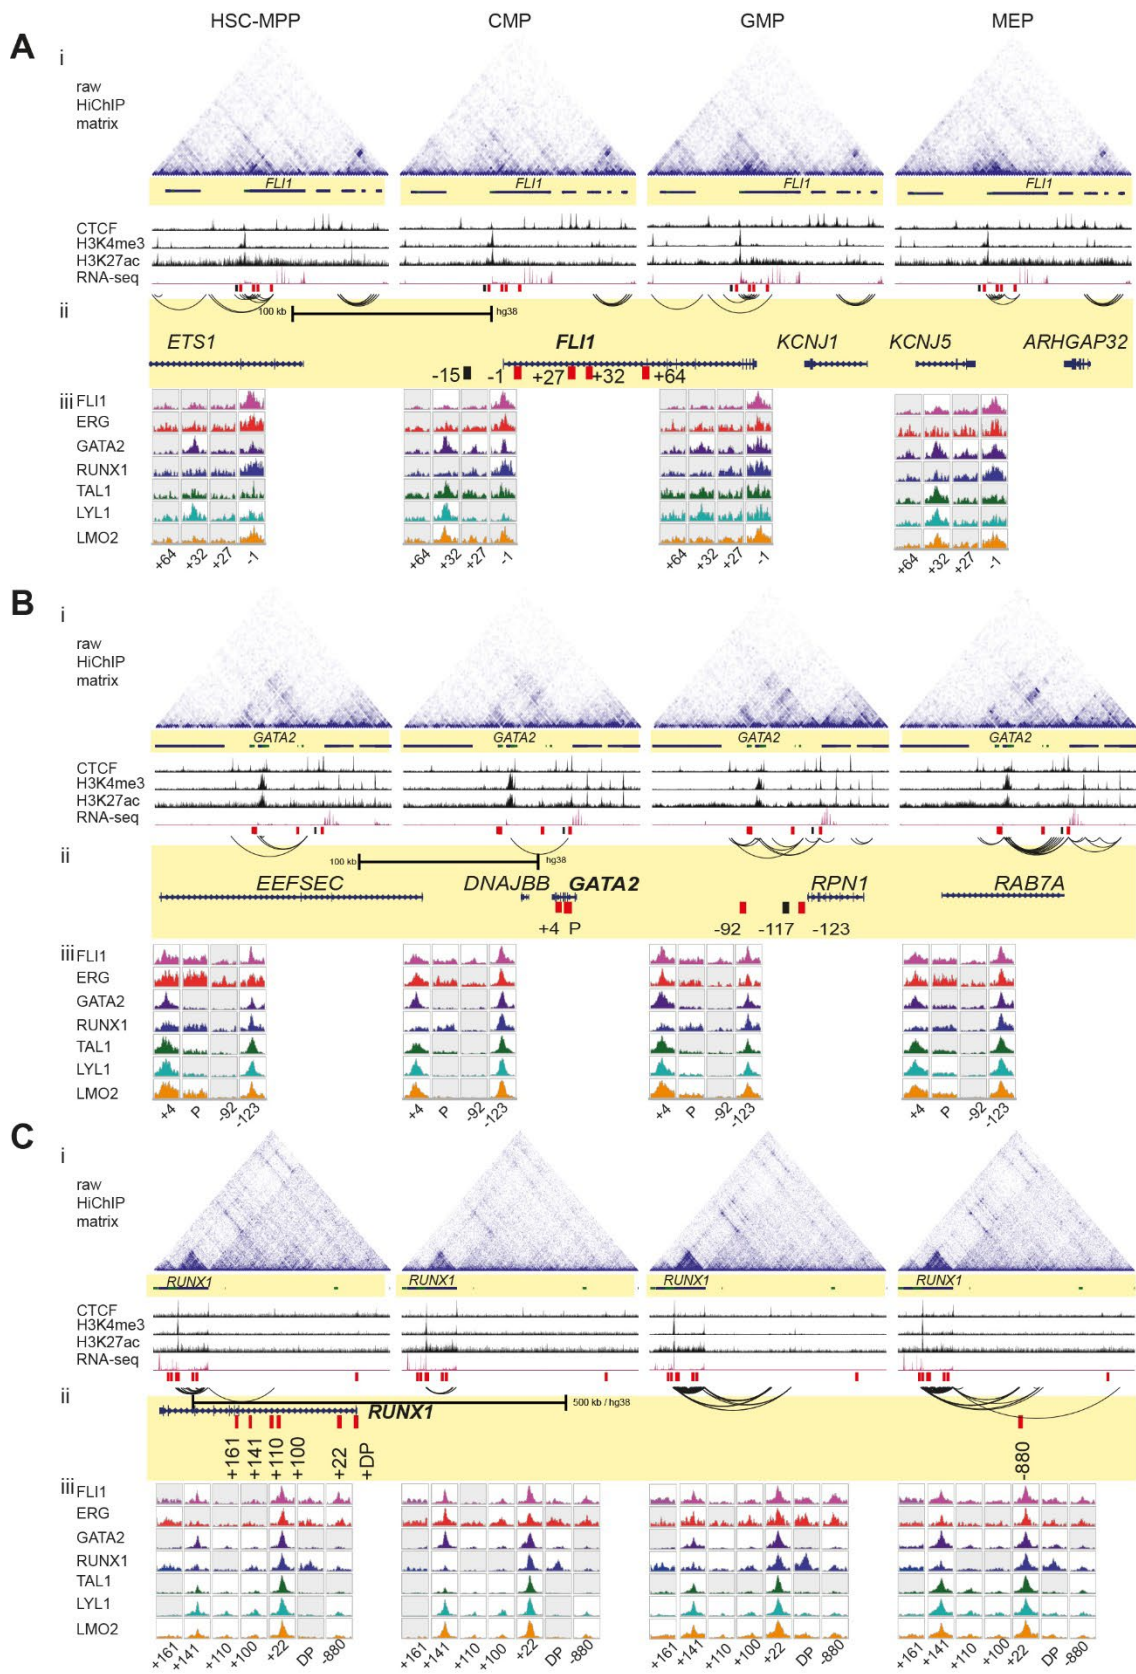

Figure S6

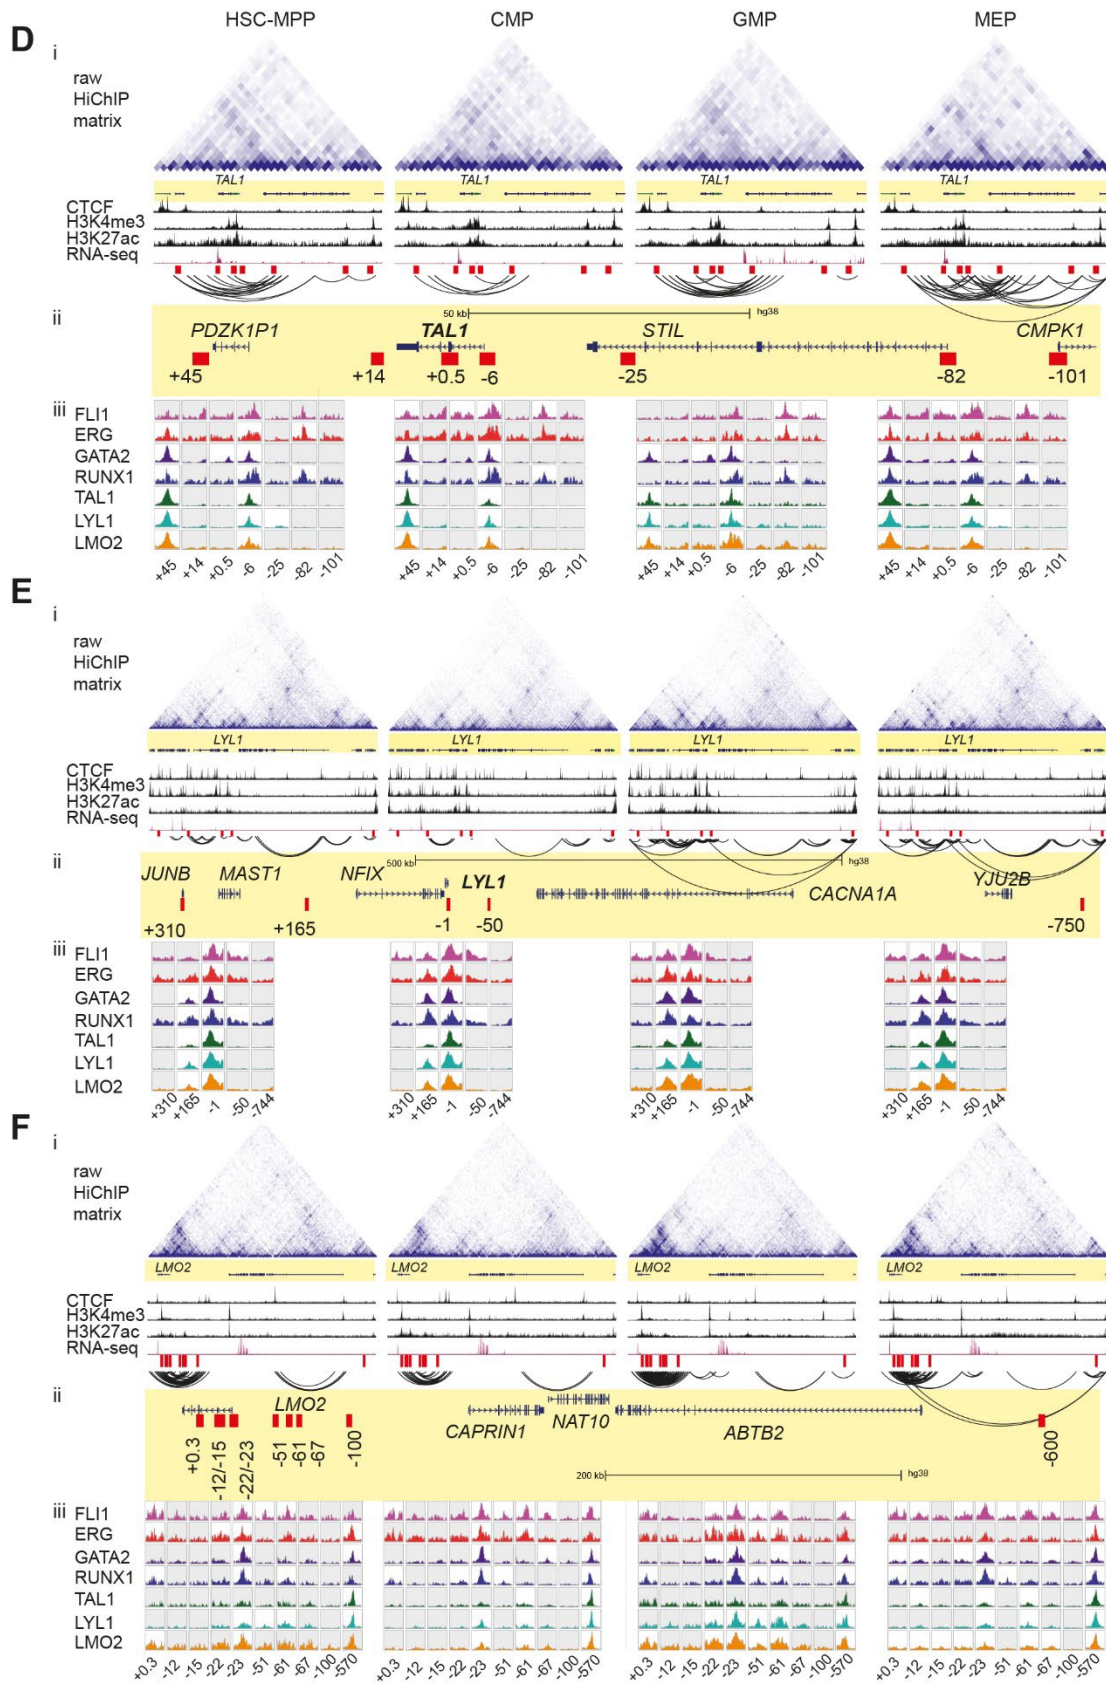

Figure S6



**Figure S6. H3K27ac HiChIP identifies cell-type specific interactions between heptad gene promoters and potential regulatory regions.** **A)** i) Raw HiChIP contact matrix, CTCF, H3K4me3, H3K27ac, IgG, RNA-seq, and significant H3K27ac HiChIP interactions ( $FDR \leq 0.01$ ) at the *FLII* locus (GRCh38 chr11:128511084-128978507). ii) Magnified view of the *FLII* locus, with potential regulators looping to the promoter shown in red and potential regulators engaged in indirect regulatory activities shown in black. iii) FLI1, ERG, GATA2, RUNX1, TAL1, LYL1, and LMO2 peaks at the regulatory regions defined in ii, are shown. **B)** i) Raw HiChIP contact matrix, CTCF, H3K4me3, H3K27ac, IgG, RNA-seq, and significant H3K27ac HiChIP interactions ( $FDR \leq 0.01$ ) at the *GATA2* locus (chr3:128,262,936-128,761,435). ii) Magnified view of the *GATA2* locus, with potential regulators looping to the promoter shown in red and potential regulators engaged in indirect regulatory activities shown in black. iii) FLI1, ERG, GATA2, RUNX1, TAL1, LYL1, and LMO2 peaks at the regulatory regions defined in ii, are shown. **C)** i) Raw HiChIP contact matrix, CTCF, H3K4me3, H3K27ac, IgG, RNA-seq, and significant H3K27ac HiChIP interactions ( $FDR \leq 0.01$ ) at the *RUNX1* locus (GRCh38 chr21:34758869-36011624). ii) Magnified view of the *RUNX1* locus, with potential regulators looping to the promoter shown in red. iii) FLI1, ERG, GATA2, RUNX1, TAL1, LYL1, and LMO2 peaks at the regulatory regions defined in ii, are shown. **D)** i) Raw HiChIP contact matrix, CTCF, H3K4me3, H3K27ac, IgG, RNA-seq, and significant H3K27ac HiChIP interactions ( $FDR \leq 0.01$ ) at the *TAL1* locus (GRCh38 chr1:47,168,881-47,340,728). ii) Magnified view of the *TAL1* locus, with potential regulators looping to the promoter shown in red. iii) FLI1, ERG, GATA2, RUNX1, TAL1, LYL1, and LMO2 peaks at the regulatory regions defined in ii, are shown. **E)** i) Raw HiChIP contact matrix, CTCF, H3K4me3, H3K27ac, IgG, RNA-seq, and significant H3K27ac HiChIP interactions ( $FDR \leq 0.01$ ) at the *LYL1* locus (GRCh38 chr19:12787014-13852204). ii) Magnified view of the *LYL1* locus, with potential regulators looping to the promoter shown in red. iii) FLI1, ERG, GATA2,

RUNX1, TAL1, LYL1, and LMO2 peaks at the regulatory regions defined in ii, are shown. **F)**

i) Raw HiChIP contact matrix, CTCF, H3K4me3, H3K27ac, IgG, RNA-seq, and significant H3K27ac HiChIP interactions ( $FDR \leq 0.01$ ) at the *LMO2* (GRCh38 chr11:33831641-34445745). ii) Magnified view of the *LMO2* locus, with potential regulators looping to the promoter shown in red. iii) FLI1, ERG, GATA2, RUNX1, TAL1, LYL1, and LMO2 peaks at the regulatory regions defined in ii, are shown.

Only those HiChIP interactions where both interacting ends were found at the given locus are shown. In addition the ChIP-seq peaks shown are RPKM-normalised and white boxes indicate presence of a computationally called ChIP-seq peak at the specific region.

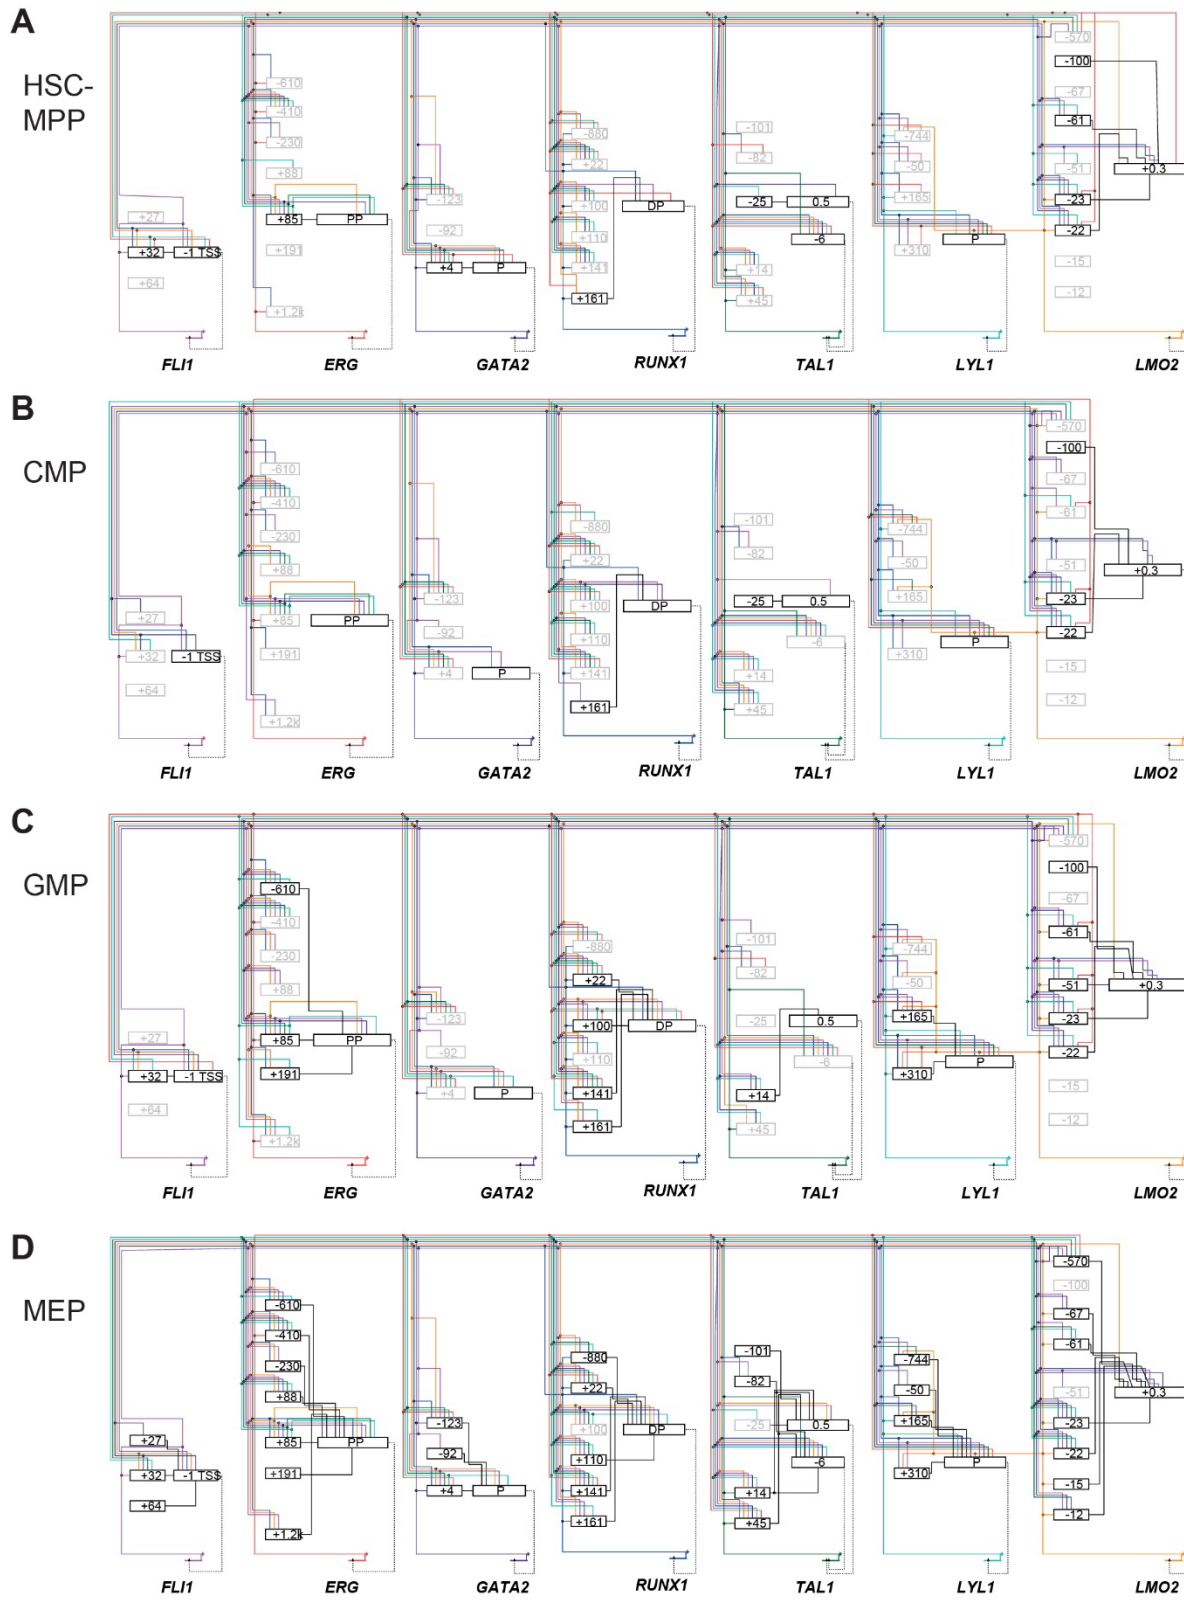

Figure S7

**Figure S7. Gene regulatory network maps of the heptad genes in HSPC subsets.** Heptad GRNs in **A)** HSC-MPP, **B)** CMP, **C)** GMP, and **D)** MEP, constructed using BioTapestry software. Boxes in bold show active regulators, and their interaction with respective promoters marked with solid black lines. Solid coloured lines indicate heptad factors binding to regulatory regions (FLI1-pink, ERG-red, GATA2-purple, RUNX1-dark blue, TAL1-green, LYL1-aqua, and LMO2-orange), while dashed lines link regulatory sub-circuits to individual genes.

**Pathways associated with :**

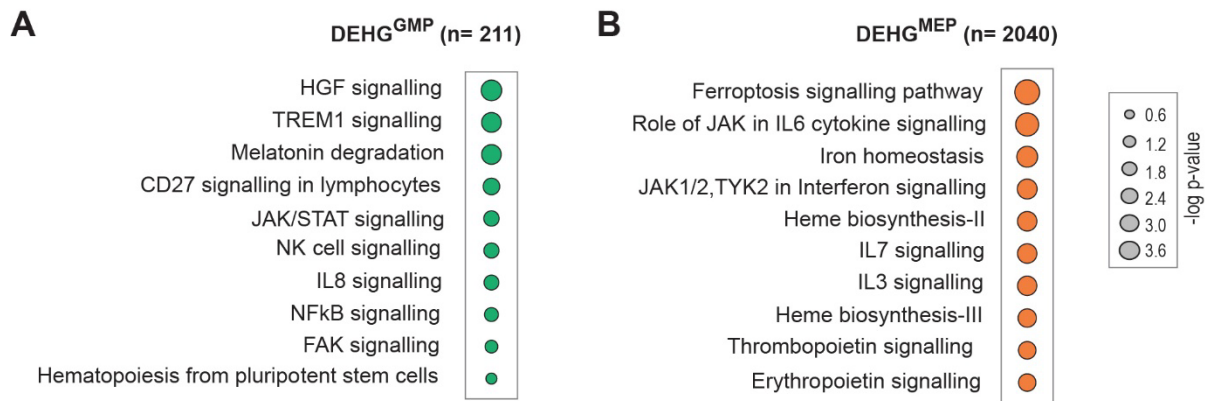

Figure S8

**Figure S8.** *The role of heptad transcription factors in regulating lineage-specific gene expression.* Ingenuity pathway analysis performed in DEHGs: **A)** DEHG<sup>GMP</sup>, and **B)** DEHG<sup>MEP</sup>.



**A** Transcription factor binding at loci associated with stem cell function

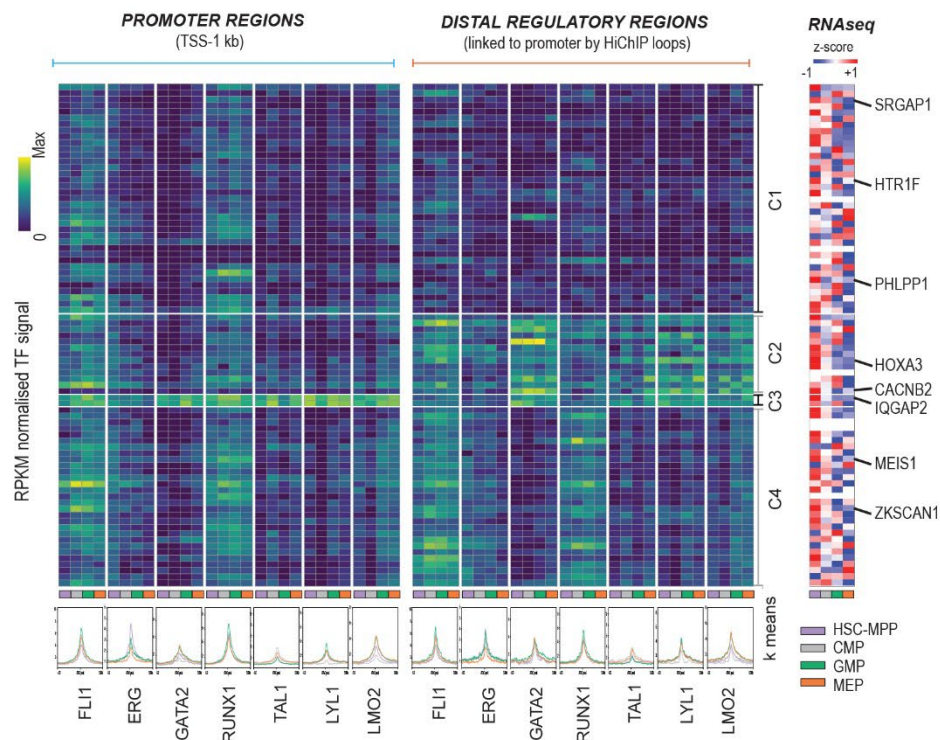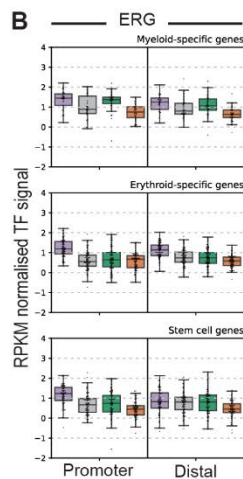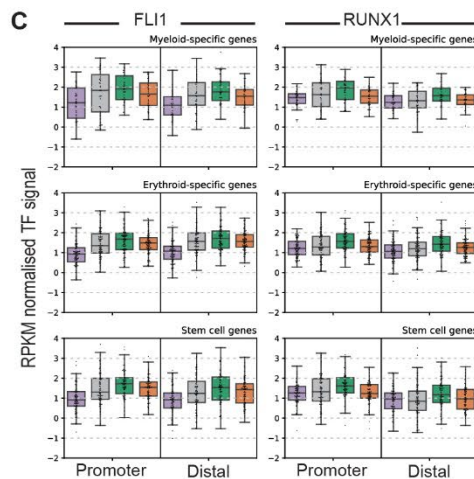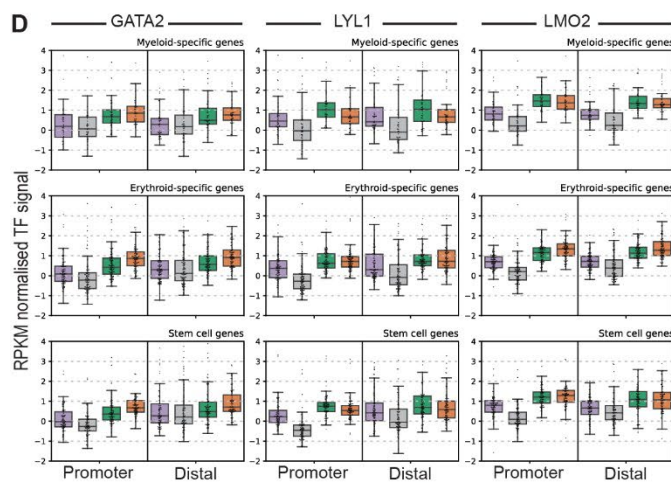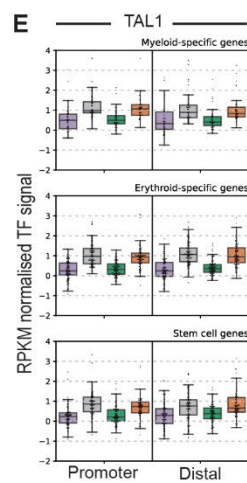

Figure S9

**Figure S9. Cell-type specific binding patterns of heptad factors identified across stem cell specific genes.** **A)** Genes associated with stem cell function. *Left:* k-means clustered heatmaps of TF binding intensity at promoters and distal regulatory regions. Profile plots show normalised signal for each TF in each cell type at the regions depicted in the heatmap. *Right:* z-score normalised heatmaps of RNA-seq counts (GSE75384) for the corresponding gene in each cell type. **B-E)** Normalised TF signal at all promoters and distal regulatory regions for myeloid, erythroid, and stem cell genes. P-values for all pairwise comparisons (paired t-test) are shown in Table S4. **B)** Boxplots showing normalised ERG signal at promoters and distal regulatory regions of myeloid, erythroid, and stem cell genes. **C)** Boxplots showing normalised FLI1 and RUNX1 signal at promoters and distal regulatory regions of myeloid, erythroid, and stem cell genes. **D)** Boxplots showing normalised GATA2, LYL1, and LMO2 signal at promoters and distal regulatory regions of myeloid, erythroid, and stem cell genes. **E)** Boxplots showing normalised TAL1 signal at promoters and distal regulatory regions of myeloid, erythroid, and stem cell genes.

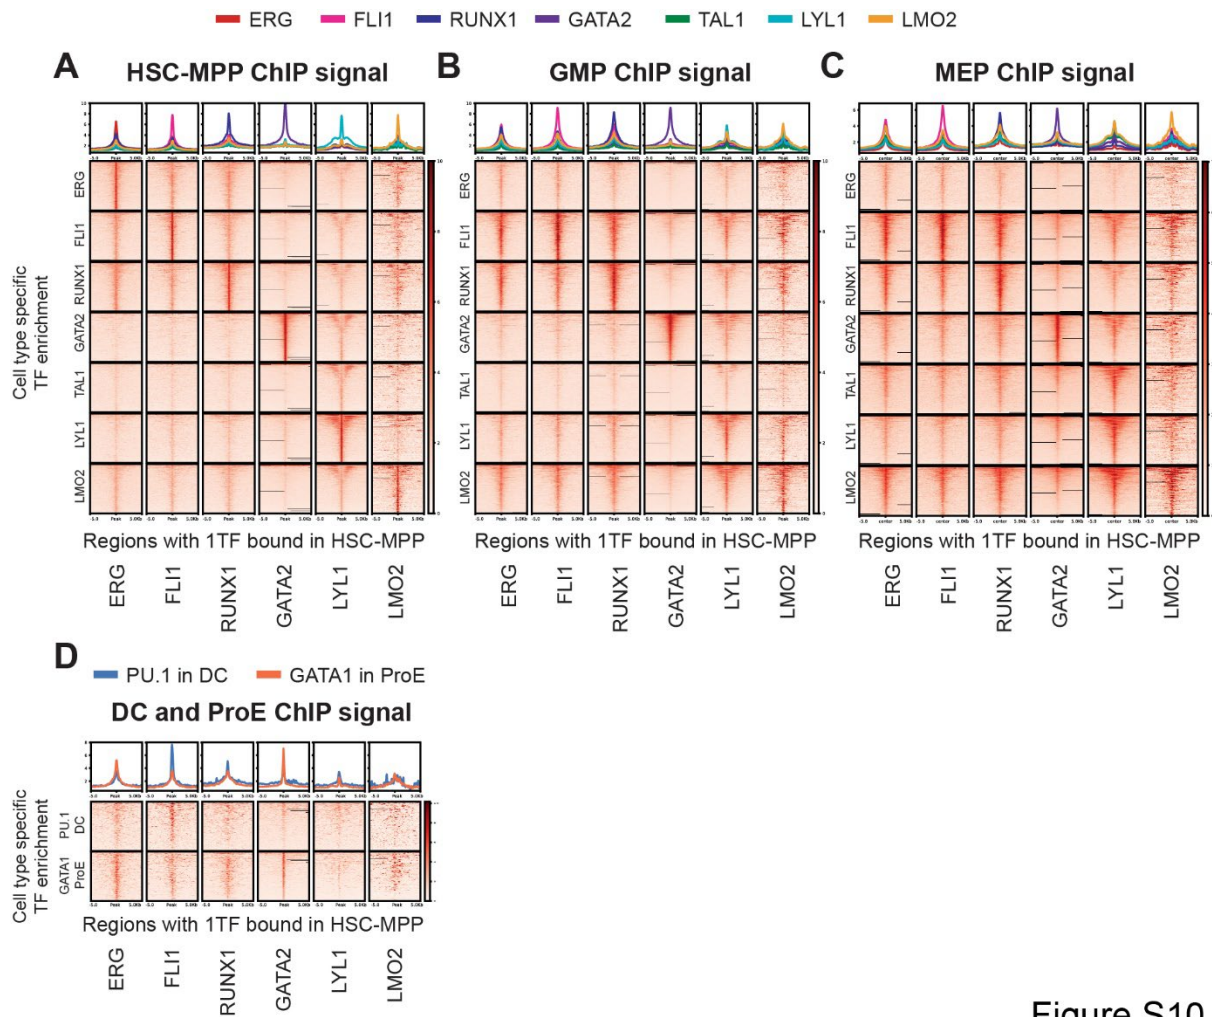

Figure S10

**Figure S10. Sites bound by single heptad factors in HSC-MPPs are commonly bound by additional heptad factors in committed progenitors and mature cells.** A-C) Density plots showing enrichment of TFs in A) HSC-MPPs B) GMPs C) MEPs at regions called as peaks for one heptad factor in HSC-MPP. TAL1 had only 54 peaks in HSC-MPPs which precluded analysis using this method. Columns show peak regions that are unique to the indicated heptad factor in HSC-MPP, rows show signal density of the indicated TF across those regions. D) Density plots showing enrichment of PU.1 in dendritic cells (DC) (GSE58864) and GATA1 in proerythroblasts (ProE) (GSE36985) at regions called as peaks for one heptad factor in HSC-MPP.





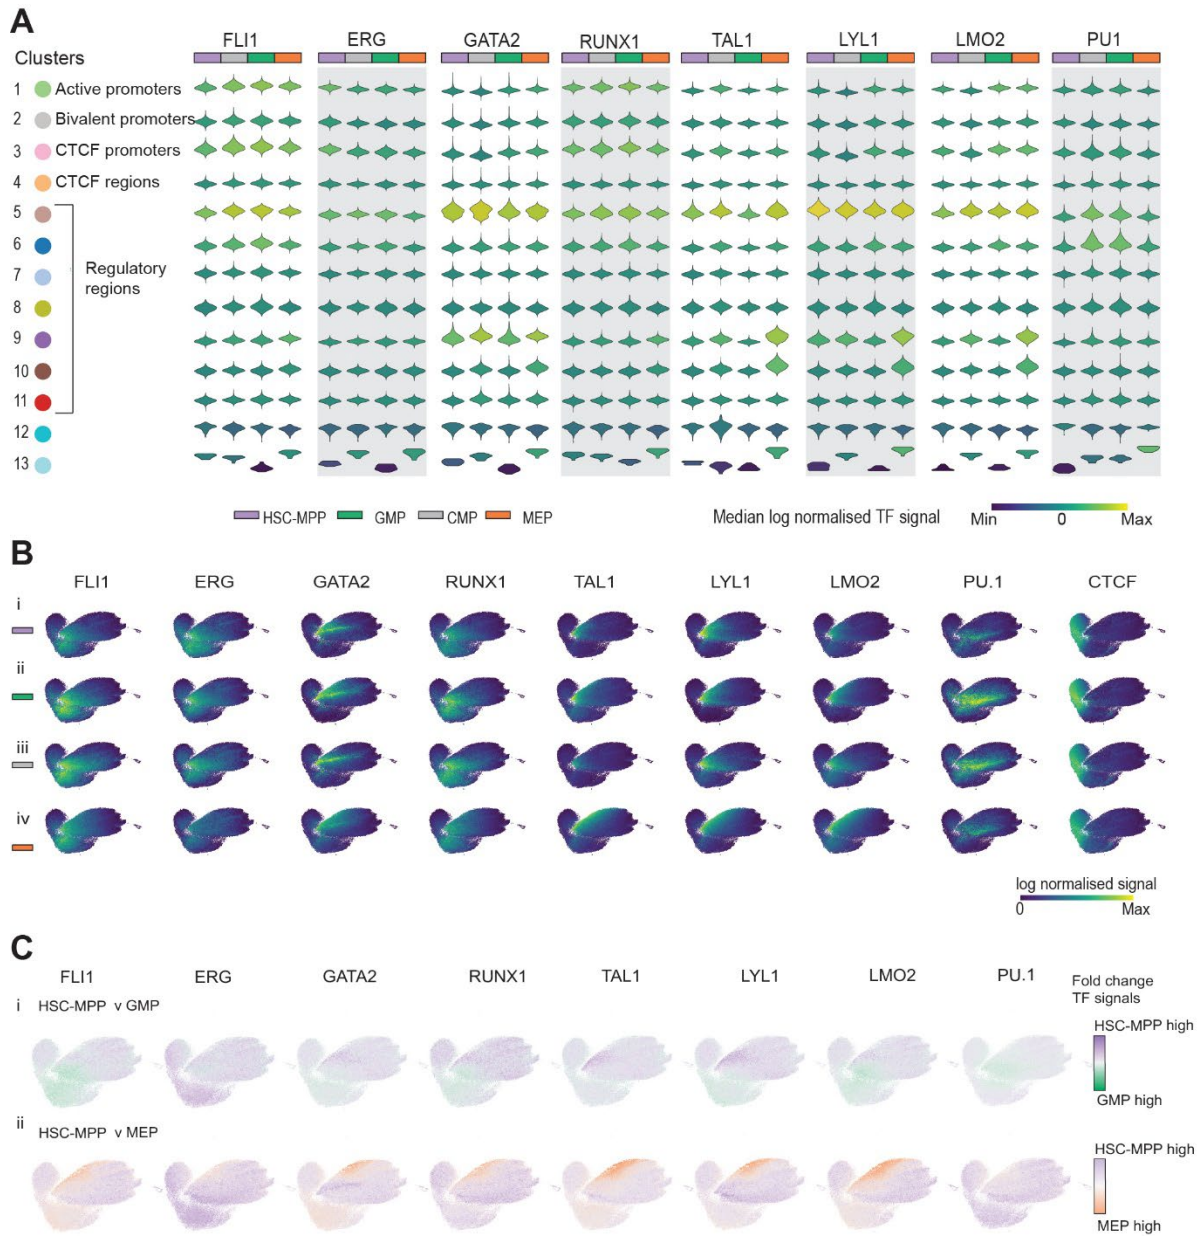

Figure S11

**Figure S11. Transcription factor signal enrichment at ATAC regions in HSPCs.** **A)** Individual violin plots show normalized transcription factor signals for FLI1, ERG, GATA2, RUNX1, TAL1, LYL1, and LMO2, in each of the 13 derived clusters for the four cell types studied. **B)** UMAPs showing heptad-factor-, PU.1-, and CTCF-normalized signals at accessible regions in i) HSC-MPP, ii) CMP, iii) GMP, and iv) MEP. **C)** UMAPs colored based on log<sub>2</sub>

fold change of binding of heptad transcription factors and PU.1 in pairwise comparisons between i) HSC-MPP and GMP, and ii) HSC-MPP and MEP.

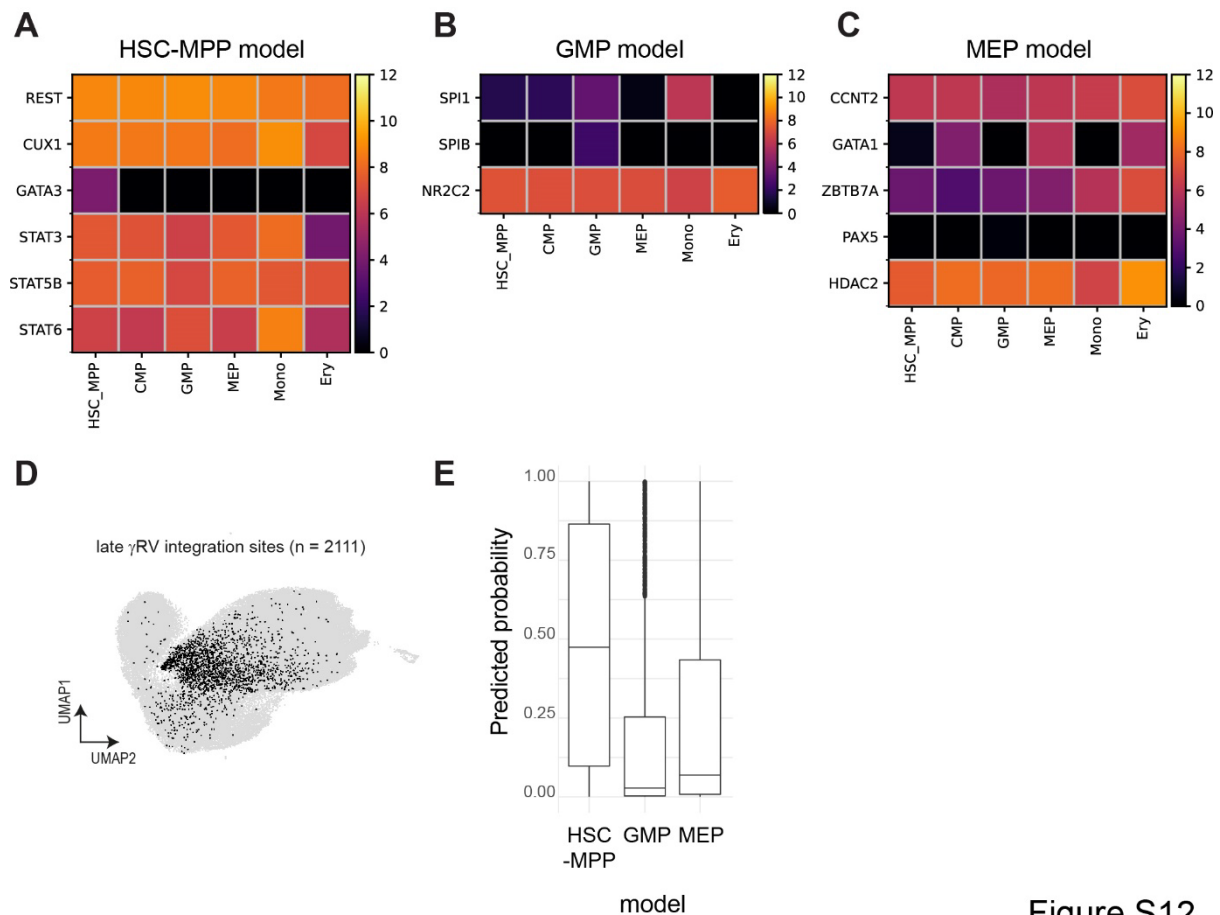

Figure S12

**Figure S12. Cell-type specificity of regulatory elements is encoded in the underlying motif composition.** (A-C) Heatmaps showing cpm-normalised RNA-seq counts (GSE75384) for selected genes in HSC-MPPs, CMPs, GMPs, MEPs, monocytes (Mono), erythroblasts (Ery). Genes shown correspond to motifs with positive SHAP values (Figure 7) for **A)** HSC-MPP model, **B)** GMP model, **C)** MEP model. Only genes expressed in at least one cell type are shown. **D)** UMAP representation of ATAC-seq regions in CD34<sup>+</sup> cells (grey) with regions corresponding to late  $\gamma$  retroviral integration sites ( $\gamma$ RV-IS, n = 2111) colored in black. Late  $\gamma$ RV-IS integration sites correspond to functionally defined regulatory regions in long term repopulating human HSCs<sup>1</sup>. **E)** Graphs showing predicted probabilities that  $\gamma$ RV-IS are HSC-MPP-, GMP-, or MEP-specific for n = 1674  $\gamma$ RV-IS. Sites that overlapped the model training data were excluded from prediction analysis.

## **Supplemental Methods**

### Antibodies, key reagents, and software

A complete list of key reagents is available in Table S9.

### Biological samples

Mobilized peripheral blood samples were collected with patient consent in accordance with the Declaration of Helsinki, and used with institutional ethics approval ref:08/190 from South Eastern Sydney Local Health District, NSW, Australia.

### Isolation of CD34<sup>+</sup> cells from cryopreserved apheresis packs

Cryopreserved cells were thawed, diluted 1:4 in 2.5% dextran/12.5% human albumin in 0.9% saline, centrifuged 200g/15 min/room temperature (RT) and resuspended in phosphate-buffered saline (DPBS) containing 10% fetal bovine serum (FBS). Cells were underlaid with lymphoprep, centrifuged 800g/30 min/RT, and mononuclear cells (MNCs) collected from the interface and washed with DPBS. MNCs were resuspended in ice cold CliniMACS buffer supplemented with 0.5% human albumin or AutoMACS running buffer then labelled with anti-CD34 microbeads according to manufacturer's instructions (Miltenyi Biotec). CD34<sup>+</sup> cells were enriched using either a CliniMACS Plus (Miltenyi Biotec) using standard clinical parameters or an AutoMACS (Miltenyi Biotec) using the program posseld2.

### Labelling and sorting of CD34<sup>+</sup> cells.

CD34<sup>+</sup> cells were resuspended in FACS buffer (5% FBS/1mM EDTA in DPBS)



containing 1/10 diluted FcBlock at a concentration of  $10^7$  cells/100  $\mu$ L and stained on ice for 30 min with a cocktail of antibodies (CD34 subset markers – CD38, CD38, CD123, CD45RA, CD90: Lineage markers (LIN) – CD2, CD3, CD4, CD7, CD8a, CD10, CD11b, CD14, CD19, CD20, CD56, GlyA/GPA/CD235ab). Cells were sorted using a BD FACS ARIA II into the following populations: HSC-MPP (LIN<sup>-</sup>, CD34<sup>+</sup>, CD38<sup>lo</sup>, CD45RA<sup>-</sup>), CMP (LIN<sup>-</sup>, CD34<sup>+</sup>, CD38<sup>+</sup>, CD45RA<sup>-</sup>, CD123<sup>+</sup>), GMP (LIN<sup>-</sup>, CD34<sup>+</sup>, CD38<sup>+</sup>, CD45RA<sup>+</sup>, CD123<sup>+</sup>), MEP (LIN<sup>-</sup>, CD34<sup>+</sup>, CD38<sup>+</sup>, CD45RA<sup>-</sup>, CD123<sup>-</sup>) (Figure S1A). Population gates were set using fluorescence minus one controls, and phenotypic purity checks were performed on collected cell fractions.

Functional validation of cell purity was carried out for a subset of experiments. Sorted cells were resuspended 1% methylcellulose supplemented with cytokines as described <sup>2</sup>, then plated in triplicate at 500 cells per dish and incubated in a humidified 37°C incubator with 5% CO<sub>2</sub> for 14 days. Three major types of colonies were counted: erythroid-lineage (BFU-E) colonies, myeloid-lineage (GM) colonies, and colonies with mixed-potential (GEMM) (Figure S1B).

#### Crosslinking and preparation of nuclei

Sorted cells were incubated in freshly prepared 1% formaldehyde in DPBS for 10 min at RT. Crosslinking was quenched by adding glycine to a final concentration of 0.125 M and incubating for 5 min at RT. Subsequent steps were performed at 4°C with cold buffers. Cells were washed then resuspended in cell lysis buffer (10mM Tris-Cl pH 8.0, 10mM NaCl, 0.2% Tergitol, supplemented with 1 $\mu$ g/mL leupeptin, 1mM Pefabloc SC, 10mM sodium butyrate) and incubated on ice for 10 minutes. Nuclei were centrifuged 1450g/10 min/4°C then snap frozen and stored at -80°C for later use.

### Chromatin Immunoprecipitation (ChIP)

ChIP for H3K27ac and H3K4me3 was carried out essentially as described<sup>3</sup>. Nuclei ( $2-5 \times 10^6$ /IP) were resuspended in 0.65mL nuclei lysis buffer (50mM Tris-Cl pH 8.0, 10mM EDTA, 1% SDS, protease inhibitors), incubated on ice for 10 minutes, with 0.4mL IP dilution buffer (20mM Tris-Cl pH 8.0, 2mM EDTA, 150mM NaCl, 1% Triton X-100, 0.01% SDS) and sonicated for 10 cycles in a Bioruptor Pico™ sonicator (Diagenode). Cleared supernatants were further diluted with 2.2mL IP dilution buffer, precleared with rabbit IgG then incubated overnight at 4°C with 5–10 µg of antibody. Antibody-chromatin complexes were recovered using protein G-agarose beads (Roche). After washing, immunoprecipitated DNA was eluted from beads, crosslinks reversed, and DNA purified using phenol-chloroform-isoamyl alcohol. ChIP libraries were prepared by a commercial supplier (Novogene). Donor cells used in each experiment are listed in Table S1.

### ChIPmentation

ChIPmentation (CM) was carried out as described<sup>4</sup> with minor modifications. Biological triplicate experiments were performed for TFs except where noted otherwise (Table S2). Five million nuclei were resuspended in 100µL sonication buffer (10mM Tris pH 8.0, 2mM EDTA, 0.25% SDS), sonicated for 10 cycles in a Bioruptor Pico™ sonicator (Diagenode) and diluted 1:1.5 in equilibrium buffer (10mM Tris pH 8.0, 233mM NaCl, 1.66% Triton X-100, 0.166% sodium deoxycholate, 1mM EDTA). Cleared supernatants were incubated overnight at 4°C with 2µg of antibody, and antibody-chromatin complexes recovered using protein A/G magnetic beads. To improve signal to noise ratio for ERG CM only, we used a modified pull down protocol with two major differences: 1) nuclei lysates

were not cleared by centrifugation after sonication, and 2) anti-ERG antibody was pre-conjugated to magnetic protein A/G beads, and then incubated with nuclear lysate overnight at 4°C to recover antibody-chromatin complexes.

After extensive washing, bead-bound complexes were resuspended in tagmentation mixture (25µL reaction containing 1 µL of enzyme in 1X buffer, Illumina) and incubated at 37°C for 25minutes. Crosslinking was reversed and DNA purified using a MinElute PCR Purification Kit (Qiagen). Barcoding/adapter primers (Table S10) and KAPA™ HiFi HotStart Ready Mix (Roche) were used to amplify libraries; the number of PCR cycles used was empirically determined for each reaction. Amplified DNA was purified then size selected using AMPure XP beads (Beckman) and sequenced using a standard Illumina 2 x 150bp PE pipeline (Novogene).

### HiC and HiChIP

Duplicate HiC and HiChIP libraries for each cell type were generated using the Arima Genomics HiC+ kit (Arima cat#A101020). Nuclei were lysed and chromatin digested with a restriction enzyme cocktail prior to end-filling with biotinylated nucleotides and ligation of proximal ends. For HiChIP, ligated fragments were then immunoprecipitated with the H3K27ac antibody. Biotinylated fragments were enriched and sheared prior to library preparation which was performed using Accel NGS 2S Plus DNA Library kit (Swift Biosciences).

### Bioinformatic processing

Analyses were run using default parameters for each tool unless otherwise indicated. Bigwig files were visualized using the UCSC browser<sup>5</sup>. Reads were aligned to the GRCh38



### Motif enrichment analysis

Motif enrichment analysis was performed using the FIMO tool from the MEME analysis suite <sup>12</sup> using ETS, GATA, RUNX, and E-Box motifs sourced from JASPAR <sup>13</sup> as a position weight matrix.

### Analysis of combinatorial binding

Genomic locations with occupancy of multiple heptad TFs were identified by intersecting ChIP peak coordinates (bedtools intersect). To assess the significance of each combination we performed a bootstrapping analysis essentially as previously described <sup>14</sup>. Briefly, we applied a permutation test to address significance of combinatorial binding events between the seven transcription factors for all 119 possible binding patterns. We chose the merged ATAC peak set of 85,117 peaks to estimate the background distribution of combinatorial binding events. The standardized z-score metric was used to express the deviation of the combinatorial binding events in high confidence peaks from the expected mean (normalized by the standard deviation) of the background distribution.

### Analysis of HiC and HiChIP data

HiChIP and HiC fastq files were processed and mapped to GRCh38, then PCR duplicates removed and contact matrices generated from the merged valid-pairs files (HiC-Pro hicpro2juicebox) <sup>15</sup>. Contact matrices (.hic files) were visualized using juicebox <sup>16</sup>. HOMER was used to identify compartments and TADs from balanced HiC-Pro contact matrices. The first principal component (PC1) was generated using runHiCpca.pl at 50 kb

bins. In addition, H3K4me3 and H3K27me3 bed files from the respective cell types were used to assign accurate compartment labelling. To further identify TADs, findTADsAndLoops.pl function was used to generate TAD calls for each replicate separately – and merge2Dbed.pl to generate a union of TADs identified in each replicate. HiChIP contact matrices were used to generate interaction pairs at 5 kb resolution (MaxHiC)<sup>17</sup> and the WashU browser was used for loop visualization<sup>18</sup>. Most interactions spanned distances >10 kb.

High confidence interactions ( $FDR \leq 0.01$ ) were used to generate a final list of promoter–regulator interactions. To map promoter-regulator interactions at heptad gene loci we identified HiChIP fragments which overlapped known promoters. Distal fragments that were linked to these promoters were intersected with ATAC peaks from the relevant populations to precisely map the contact region within 5kb HiChIP fragments (Table S3). Contact regions were named according to their linear genomic distance upstream (-) or downstream (+) from the transcriptional start site (TSS).

### Visualization of gene regulatory networks (GRNs)

GRNs were visualized with BioTapestry<sup>19</sup> using ChIPseq peak calls and HiChIP-derived promoter–regulatory links to construct the network maps.

### Identifying differentially bound regions

Candidate regulatory elements (REs) were defined as regions displaying combinatorial binding of heptad factors with a positive z-score, indicating that the combination is observed at higher frequency than expected by random chance. DiffBind was used to identify regions showing a significantly higher ( $FDR \leq 0.05$ ) combinatorial TF signal in one cell type compared to all others<sup>20</sup>. Two criteria were used for linking differentially

bound REs with genes: the presence of a RE at a gene promoter, or within a HiChIP fragment that was in turn linked to a gene promoter. Gene lists derived using this method were subsequently used for GSEA, IPA, and single cell RNAseq analysis (Figure 4).

#### Analysis of bulk RNAseq data

Fastq files and count tables were downloaded from GEO (GSE75384) and fastq files aligned to GRCh38 (STAR)<sup>21</sup>. edgeR was used to normalise the count table and calculate log<sub>2</sub> CPM values<sup>22</sup> then derive a z-score of RNA expression.

#### Analysis of single cell RNAseq data

SCANPY<sup>23</sup> was used to process existing single-cell RNA sequencing data<sup>24</sup>. The SCANPY score\_genes tool was used to generate a score for our gene sets, which was ultimately plotted on the original tSNE map generated by those authors.

#### TF occupancy at specific gene regulatory regions

Lists of genes associated with stem, myeloid, or erythroid function (Table S5B) were compiled from MSigDB genesets<sup>25</sup> (stem cell function – EPPERT\_HSC\_R<sup>26</sup>, IVANOVA\_HEMATOPOIESIS\_STEM\_CELL<sup>27</sup>; myeloid cell development – BIOCARTA\_MONOCYTE\_PATHWAY, BIOCARTA\_GRANULOCYTES\_PATHWAY, GOBP\_GRANULOCYTE\_DIFFERENTIATION, GOBP\_GRANULOCYTE\_MIGRATION, GOBP\_GRANULOCYTE\_ACTIVATION; erythroid cell development – HALLMARK\_HEME\_METABOLISM<sup>28</sup>, GNATENKO\_PLATELET\_SIGNATURE<sup>29</sup>,

BIOCARTA\_PLATELETAPP\_PATHWAY). Curated lists may not comprehensively catalogue every lineage specific gene. For this analysis promoter regions for each gene were defined as the ATAC peak occurring up to 10 kb upstream of the TSS. Distal fragments that were linked to these promoters in HiChIP datasets were intersected with ATAC peaks from the relevant population to define the distal regulatory element. Gene promoters lacking a looped distal region were excluded from this analysis. To determine the heptad TF signal for each distal region, we added together the average signal across each region from log<sub>2</sub>-normalised bigwig tracks from each TF (bigWigAverageOverBed). If a looped distal regulator contained more than one ATAC peak, the TF signal from each peak region was averaged. We performed *k*-means clustering on the derived data using SciPy<sup>30</sup> and plotted the resulting heatmaps with seaborn.

### Clustering analysis

The merged set of ATAC peaks which represent open chromatin regions across HSPCs were annotated using ChIP (heptad, PU.1, CTCF, ATAC, H3K27ac, H3K4me3, and H3K27me3) and ATAC signal from each individual cell type to create a dataframe of 85,100 rows and 52 columns, and the regions clustered with SCANPY using the Louvain method<sup>23,31</sup>. Gene associations for each ATAC region were predicted with the Genomic Regions of Enrichment Analysis Tool (GREAT) using the basal plus extension method with default parameters<sup>32,33</sup>. To identify regulatory regions preferentially used in specific cell types we compared TF signal at each region in HSC-MPP versus GMP, HSC-MPP versus MEP, and GMP versus MEP. We classified regions with log<sub>2</sub> fold change > 2 for each heptad factor in a cell type as cell-specific-regions. Regions identified by this method were subsequently used for machine learning models (Figure 7).



### Machine learning analysis to predict cell type

We trained models using the R package XGBoost<sup>34</sup>. Briefly, we read a table of motif counts across the individual cell-specific-regions and took 70% of the peaks at random as the training set. We removed motifs with low variability and retained the remaining 30% of peaks as the test set. During the training, a series of decision trees were created such that a “loss function” was reduced (binary logistic in our case), to minimize cell type prediction error. Post training, prediction was performed on the test set. SHapley Additive exPlanation (SHAP) scores were calculated for every motif and peak used in the training set to indicate their respective contribution to the classification. A positive SHAP score for any given motif indicates that the presence of that motif in a region increases the probability that region belongs to the target cell type while a negative score indicates that the presence of that motif in a region increases the probability that region belongs to the background set (i.e., one of the other cell types). We then ranked motifs according to their importance by adding the absolute SHAP scores for every motif. To identify the direction of enrichment, we calculated the mean number of counts of every motif in the peaks that come from the target cell type or from the background peaks separately; if the mean was higher in the peaks from the target cell type those motifs were indicated as enriched in the target cell type and vice versa for the background set.

### Analysis of $\gamma$ retroviral integration site data

Late  $\gamma$  retroviral integration cluster genomic coordinates<sup>1</sup>, representing viral integration sites (and thus potentially active regulatory elements) in long term repopulating human HSCs, were first overlapped with our merged ATAC peaks to generate genomic regions to use with our machine learning models (late  $\gamma$ RV-IS,  $n = 2111$ ). Of these, 395 (18.7%) corresponded to HSC-MPP-specific ATAC regions identified in our analysis; conversely 9.8% of our HSC-

MPP-specific sites corresponded to late  $\gamma$ RV-IS. We next filtered out any regions that were part of the training sets for our models, leaving 1674 regions representing functionally validated regulatory regions that are active in hematopoietic stem cells with the capacity to engraft humans in a gene therapy setting (late  $\gamma$ RV-IS). Late  $\gamma$ RV-IS regions were scored against each machine learning model, and the predicted probabilities for each model plotted.

#### Data availability

A UCSC browser session for visualisation of chromatin occupancy and looping data is provided at [http://genome.ucsc.edu/s/PimandaLab/Heptad\\_Regulome](http://genome.ucsc.edu/s/PimandaLab/Heptad_Regulome). We also provide a web tool for data exploration ([http://unsw-data-analytics.shinyapps.io/CD34\\_Heptad\\_Regulome](http://unsw-data-analytics.shinyapps.io/CD34_Heptad_Regulome)). Raw and processed sequencing files have been uploaded to GEO with accession # GSE231486.

## References

1. Wunsche P, Eckert ESP, Holland-Letz T, et al. Mapping Active Gene-Regulatory Regions in Human Repopulating Long-Term HSCs. *Cell Stem Cell*. 2018;23(1):132-146 e139.
2. Schuller CE, Jankowski K, Mackenzie KL. Telomere length of cord blood-derived CD34(+) progenitors predicts erythroid proliferative potential. *Leukemia*. 2007;21(5):983-991.
3. Diffner E, Beck D, Gudgin E, et al. Activity of a heptad of transcription factors is associated with stem cell programs and clinical outcome in acute myeloid leukemia. *Blood*. 2013;121(12):2289-2300.
4. Schmidl C, Rendeiro AF, Sheffield NC, Bock C. ChIPmentation: fast, robust, low-input ChIP-seq for histones and transcription factors. *Nat Methods*. 2015;12(10):963-965.
5. Kent WJ, Sugnet CW, Furey TS, et al. The human genome browser at UCSC. *Genome Res*. 2002;12(6):996-1006.
6. Li H, Durbin R. Fast and accurate short read alignment with Burrows-Wheeler transform. *Bioinformatics*. 2009;25(14):1754-1760.
7. Li H, Handsaker B, Wysoker A, et al. The Sequence Alignment/Map format and SAMtools. *Bioinformatics*. 2009;25(16):2078-2079.
8. Quinlan AR, Hall IM. BEDTools: a flexible suite of utilities for comparing genomic features. *Bioinformatics*. 2010;26(6):841-842.
9. Martin M. Cutadapt removes adapter sequences from high-throughput sequencing reads. *EMBnetjournal*. 2011;17(1):10-12.
10. Ramirez F, Ryan DP, Gruning B, et al. deepTools2: a next generation web server for deep-sequencing data analysis. *Nucleic Acids Res*. 2016;44(W1):W160-165.

11. Thoms JAI, Truong P, Subramanian S, et al. Disruption of a GATA2-TAL1-ERG regulatory circuit promotes erythroid transition in healthy and leukemic stem cells. *Blood*. 2021;138(16):1441-1455.
12. Grant CE, Bailey TL, Noble WS. FIMO: scanning for occurrences of a given motif. *Bioinformatics*. 2011;27(7):1017-1018.
13. Castro-Mondragon JA, Riudavets-Puig R, Rauluseviciute I, et al. JASPAR 2022: the 9th release of the open-access database of transcription factor binding profiles. *Nucleic Acids Res*. 2022;50(D1):D165-D173.
14. Beck D, Thoms JA, Perera D, et al. Genome-wide analysis of transcriptional regulators in human HSPCs reveals a densely interconnected network of coding and noncoding genes. *Blood*. 2013;122(14):e12-22.
15. Servant N, Varoquaux N, Lajoie BR, et al. HiC-Pro: an optimized and flexible pipeline for Hi-C data processing. *Genome Biol*. 2015;16:259.
16. Durand NC, Shamim MS, Machol I, et al. Juicer Provides a One-Click System for Analyzing Loop-Resolution Hi-C Experiments. *Cell Syst*. 2016;3(1):95-98.
17. Alinejad-Rokny H, Ghavami Modegh R, Rabiee HR, et al. MaxHiC: A robust background correction model to identify biologically relevant chromatin interactions in Hi-C and capture Hi-C experiments. *PLoS Comput Biol*. 2022;18(6):e1010241.
18. Li D, Hsu S, Purushotham D, Sears RL, Wang T. WashU Epigenome Browser update 2019. *Nucleic Acids Res*. 2019;47(W1):W158-W165.
19. Longabaugh WJ. BioTapestry: a tool to visualize the dynamic properties of gene regulatory networks. *Methods Mol Biol*. 2012;786:359-394.
20. Stark R, Brown G. DiffBind: differential binding analysis of ChIP-Seq peak data 2011.

21. Dobin A, Davis CA, Schlesinger F, et al. STAR: ultrafast universal RNA-seq aligner. *Bioinformatics*. 2013;29(1):15-21.
22. Robinson MD, McCarthy DJ, Smyth GK. edgeR: a Bioconductor package for differential expression analysis of digital gene expression data. *Bioinformatics*. 2010;26(1):139-140.
23. Wolf FA, Angerer P, Theis FJ. SCANPY: large-scale single-cell gene expression data analysis. *Genome Biol*. 2018;19(1):15.
24. Setty M, Kisieliovas V, Levine J, Gayoso A, Mazutis L, Pe'er D. Characterization of cell fate probabilities in single-cell data with Palantir. *Nat Biotechnol*. 2019;37(4):451-460.
25. Liberzon A, Subramanian A, Pinchback R, Thorvaldsdottir H, Tamayo P, Mesirov JP. Molecular signatures database (MSigDB) 3.0. *Bioinformatics*. 2011;27(12):1739-1740.
26. Eppert K, Takenaka K, Lechman ER, et al. Stem cell gene expression programs influence clinical outcome in human leukemia. *Nat Med*. 2011;17(9):1086-1093.
27. Ivanova NB, Dimos JT, Schaniel C, Hackney JA, Moore KA, Lemischka IR. A stem cell molecular signature. *Science*. 2002;298(5593):601-604.
28. Liberzon A, Birger C, Thorvaldsdottir H, Ghandi M, Mesirov JP, Tamayo P. The Molecular Signatures Database (MSigDB) hallmark gene set collection. *Cell Syst*. 2015;1(6):417-425.
29. Gnatenko DV, Dunn JJ, McCorkle SR, Weissmann D, Perrotta PL, Bahou WF. Transcript profiling of human platelets using microarray and serial analysis of gene expression. *Blood*. 2003;101(6):2285-2293.
30. Virtanen P, Gommers R, Oliphant TE, et al. SciPy 1.0: fundamental algorithms for scientific computing in Python. *Nat Methods*. 2020;17(3):261-272.

31. Blondel VD, Guillaume J-L, Lambiotte R, Lefebvre E. Fast unfolding of communities in large networks. *Journal of Statistical Mechanics: Theory and Experiment*. 2008;2008(10):P10008.
32. McLean CY, Bristor D, Hiller M, et al. GREAT improves functional interpretation of cis-regulatory regions. *Nat Biotechnol*. 2010;28(5):495-501.
33. Tanigawa Y, Dyer ES, Bejerano G. WhichTF is functionally important in your open chromatin data? *PLoS Comput Biol*. 2022;18(8):e1010378.
34. Chen T, Guestrin C. XGBoost: A Scalable Tree Boosting System. Proceedings of the 22nd ACM SIGKDD International Conference on Knowledge Discovery and Data Mining. San Francisco, California, USA; 2016.
